# Supplementary material
Source: HighWire-hosted journal article supplement (https://bmjopen.bmj.com/content/12/4/e055189)
Supplement: inline-supplementary-material-3 [file inline-supplementary-material-3.pdf]

Table: 1S oxygen saturation with time of transfusion

|                                   | time ≤3 days |       |         | time >3 days |       |         |
|-----------------------------------|--------------|-------|---------|--------------|-------|---------|
|                                   | COPLA        | SMT   | p value | COPLA        | SMT   | p value |
| Mean SPO <sub>2</sub> at Baseline | 85.97        | 86.06 | 0.824   | 85.51        | 85.98 | 0.448   |
| Mean SPO <sub>2</sub> at 24 hours | 93.35        | 93.53 | 0.698   | 92.70        | 93.91 | 0.220   |
| Mean SPO <sub>2</sub> at 48 hours | 94.27        | 93.73 | 0.328   | 93.62        | 94.30 | 0.310   |
| Mean SPO <sub>2</sub> at 72 hours | 94.96        | 94.90 | 0.886   | 93.80        | 94.54 | 0.288   |
| Mean SPO <sub>2</sub> at 7 days   | 95.45        | 95.41 | 0.904   | 94.92        | 95.37 | 0.379   |
| Mean SPO <sub>2</sub> at 10 days  | 95.28        | 94.36 | 0.364   | 93.89        | 95.45 | 0.216   |
| Mean SPO <sub>2</sub> at 14 days  | 95.18        | 94.88 | 0.728   | 153.33       | 95.44 | 0.287   |
| Mean SPO <sub>2</sub> at 28 days  | 95.50        | 96.00 | 0.737   | 96.00        | 95.67 | 0.899   |
